# Supplementary material
Source: publisher figshare collection journal article supplement (https://frontiersin.figshare.com/ndownloader/files/26401147)

A

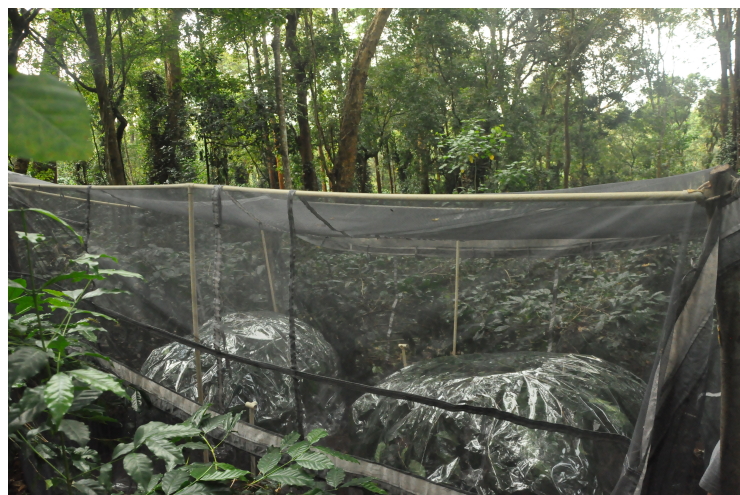

b

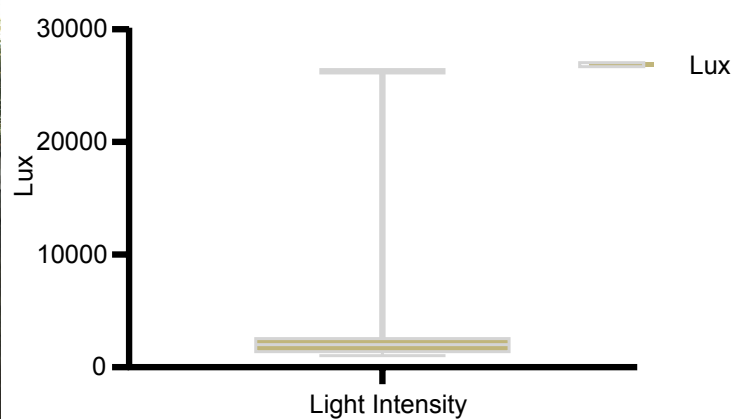

C

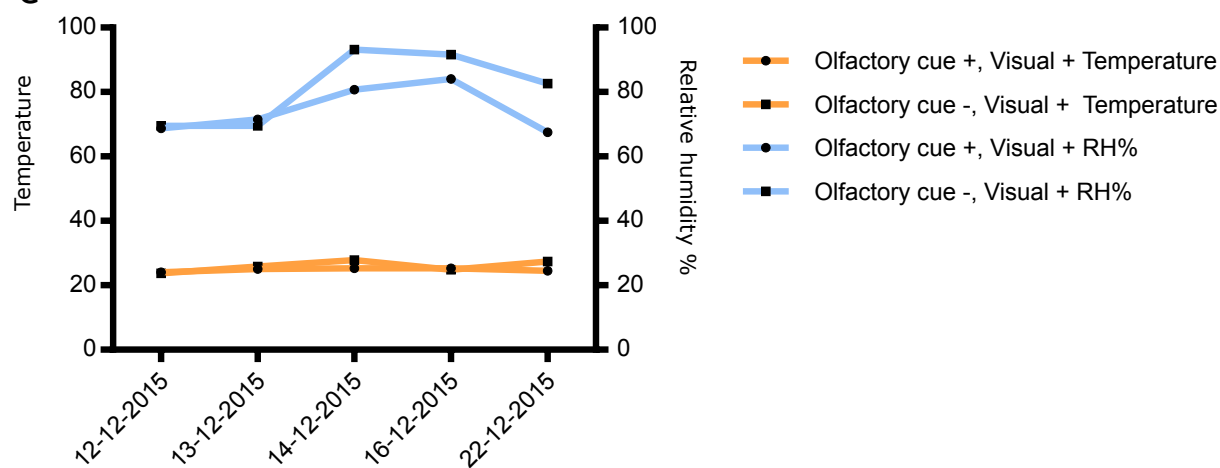

B

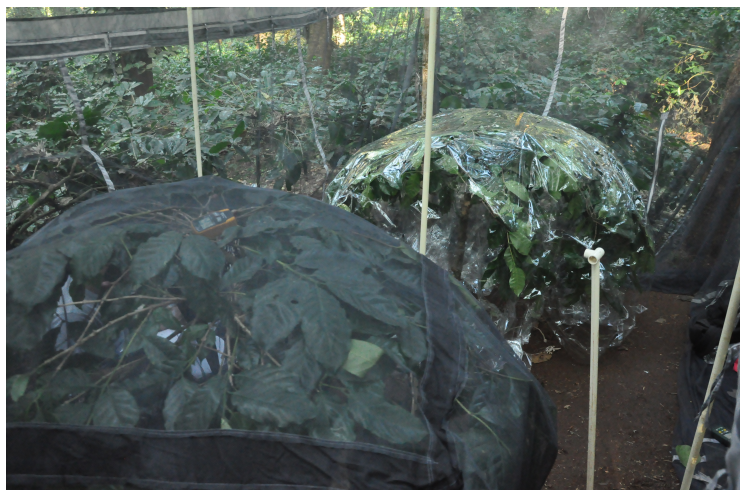

b

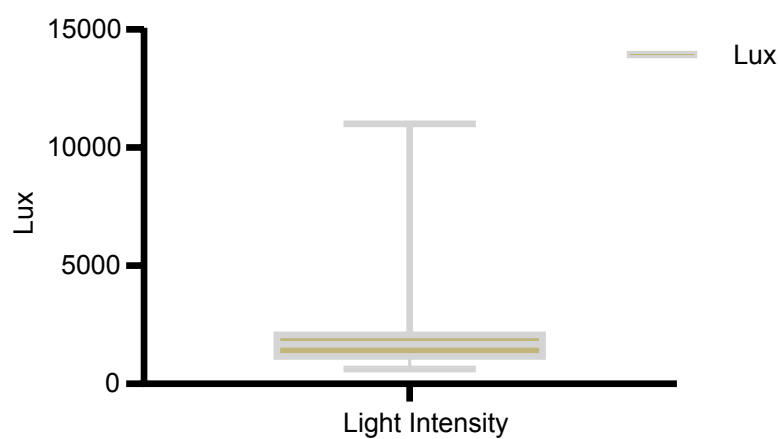

C

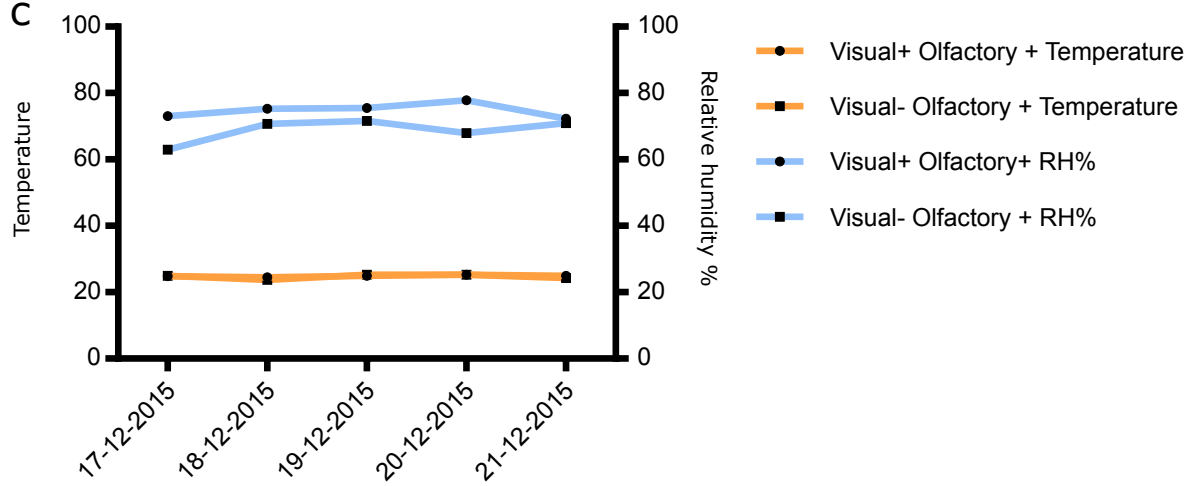

Supplement: Supplementary file 1 [file 26401147]
